# Supplementary material
Source: MDPI journal article supplement (https://www.mdpi.com/2673-6284/12/2/27)
Supplement: s1 [file s1]

# Molecular Characterization of Dehydrin in Azraq Saltbush among Related *Atriplex* Species

Anas Musallam, Saeid Abu-Romman, Monther T. Sadler

**Supplementary Table S1.** Primer information used in present study.

| # | Primer name   | T <sub>m</sub> | Sequence 5'-3'        |
|---|---------------|----------------|-----------------------|
| 1 | A.sp._F08     | 65.6           | GAGGCACCCGTACCCGTGGAG |
| 2 | A.sp._R08     | 51.9           | CTCCTTTTTCTCTTCATGATC |
| 3 | A.sp._R09/10R | 53.9           | CTCAGCATCATTCTTAGAGTG |
| 4 | A.sp._09F     | 51.9           | CGATCGTGGTATGTTTGATTT |
| 5 | A.sp._11R     | 54.9           | GCCAGGGATTTTGTCTTG    |
| 6 | A.sp._11F     | 56.1           | CAAGCCGTCGTACGAGG     |
| 7 | A.sp._12F     | 58.9           | ACGTCTCCGAACCCGTCG    |

**Supplementary Table S2.** Pore-lining sequence for DHN protein species.

| Accession # | Sequence lining   | N-terminus    | C-terminus    |
|-------------|-------------------|---------------|---------------|
| AFC98463    | NYKEAPVPVESTDRGM  | Cytosolic     | Extracellular |
| AGZ86543    | IEKIHVQDHSVYSEPSY | Cytosolic     | Extracellular |
| AYH52682    | EKIHVQDHSVHSEPSY  | Cytosolic     | Extracellular |
| AYH52683    | EKIHVQDHSVHSEPSY  | Cytosolic     | Extracellular |
| AYH52684    | PIEKIHVQDHSVHSEP  | Cytosolic     | Extracellular |
| AYH52685    | EKIHVQDHSVHSEPSY  | Cytosolic     | Extracellular |
| AYH52686    | EKIHVQDHSVYSEPSY  | Cytosolic     | Extracellular |
| AYH52687    | EKIHVQDHSVHSEPSY  | Cytosolic     | Extracellular |
| AYH52688    | EKIHVQDHSVHSEPSY  | Cytosolic     | Extracellular |
| AYH52689    | EDAVISGVEKAHVFS   | Extracellular | Cytosolic     |
| AYH52690    | EAVTVATAEPSVEG    | Cytosolic     | Extracellular |
| AYH52691    | EKIHVQDHSVHSEPSY  | Cytosolic     | Extracellular |
| AYH52692    | EKIHVQDHSVHSEPSY  | Cytosolic     | Extracellular |
| AYH52693    | EKIHVQDHSVHSEPSY  | Cytosolic     | Extracellular |
| AYH52694    | EKIHVQDHSVYSEPSY  | Cytosolic     | Extracellular |
| AYH52695    | EKIHVQDHSVYSEPSY  | Cytosolic     | Extracellular |

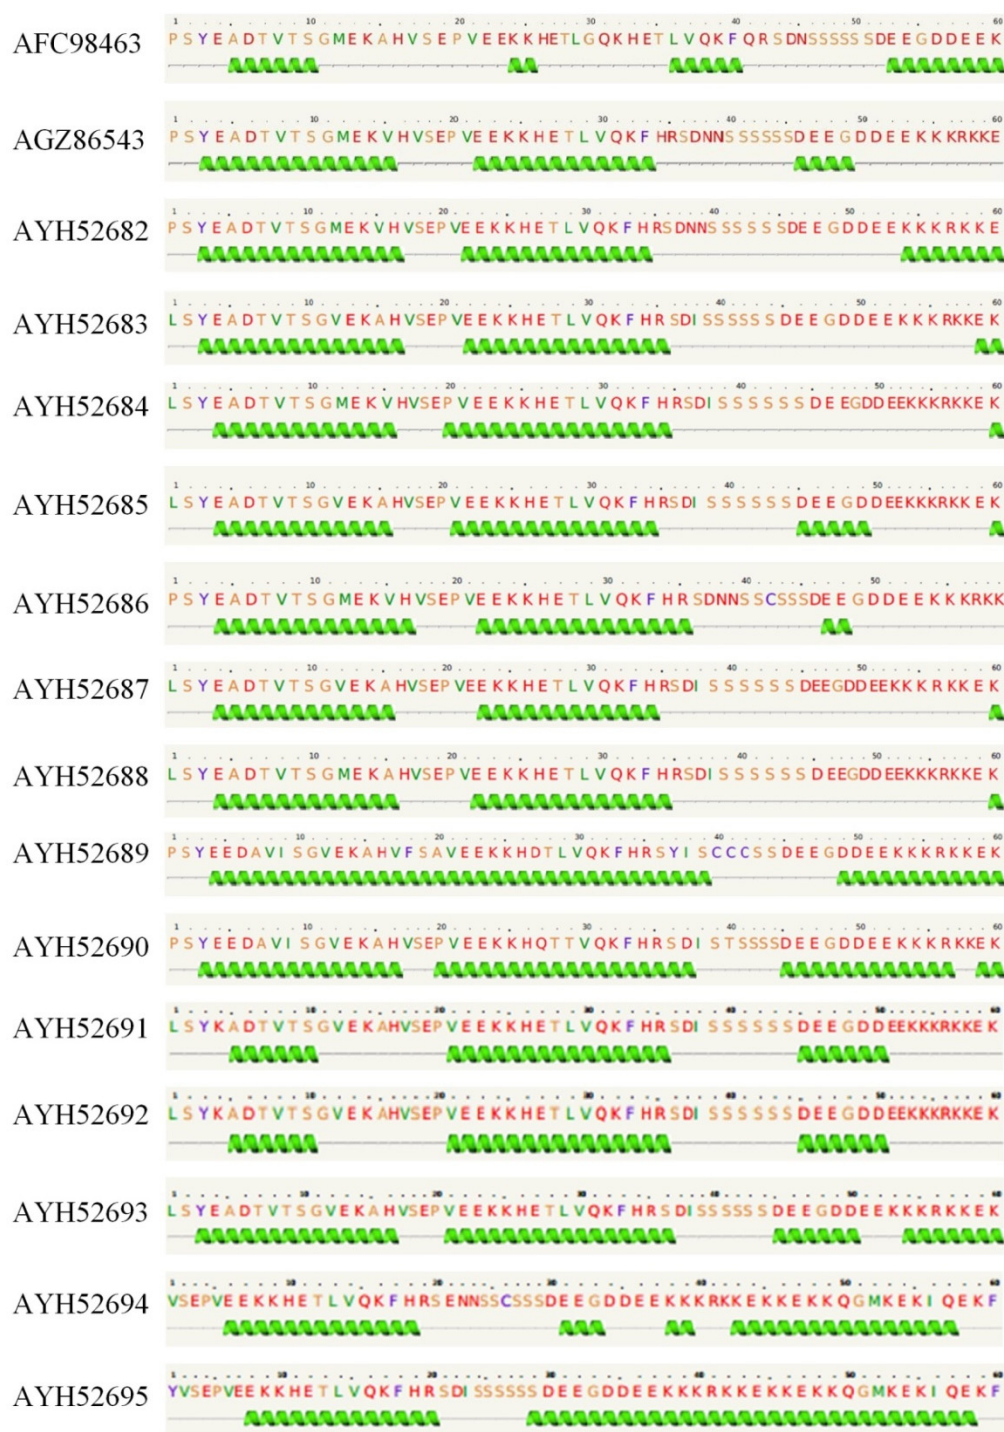

**Supplementary Figure S1.** *Atriplex* DHN secondary structure prediction spanning N-terminus - S- and K1-segments.
